# Supplementary material
Source: Springer Nature journal article supplement (https://www.springermedizin.de/resource/supplementary/12913_2011_2281_MOESM1_ESM.pdf/9530226)

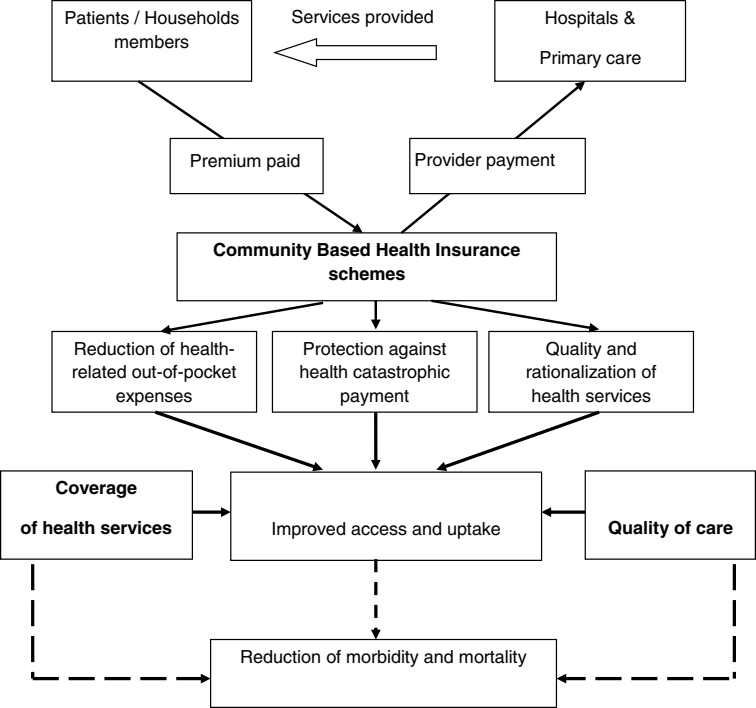

Supplement: MOESM1 [file 9530226]
